# Supplementary material for: One-step hydrothermal synthesis of a ternary heterojunction g-C3N4/Bi2S3/In2S3photocatalyst and its enhanced photocatalytic performance
Source: Royal Society of Chemistry journal article supplement (doi:10.1039/d1ra00729g), 2021-01-01
Supplement: d1ra00729g1.pdf [file d1ra00729g1.pdf]

### Additional information

Due to limited laboratory equipment and the impact of the epidemic, the TOC curve cannot be measured

We have adopted another method that can be implemented.

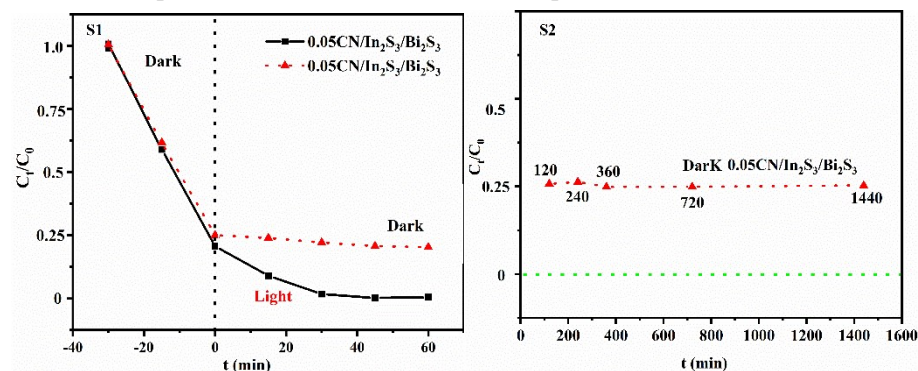

As shown in Figure S<sub>1</sub>, S<sub>2</sub>, the same catalyst was used for comparison under dark and light conditions. The initial concentration ratio of the solution under the dark condition for a long time (12h) is kept at 0.25. However, after 15 minutes of light conditions, the absorbance of the solution was almost zero. It can be inferred that the content of organic matter in the solution is decreasing under light conditions. (Because the absorbance of azo dyes is related to the concentration at a specific wavelength)
